# Supplementary material
Source: publisher site journal article supplement (https://www.dovepress.com/article/413969)
Supplement: Supplementary file 1 [file get_supplementary_file.php]

**Appendix Table 1. Comparative Studies for COPD case-finding from 2011-2021.**

| Study characteristics |             | Criteria           |         |                  | Settings  |         |                    | Case-finding tool | Performance |                            |      |                             | COPD definition                   |
|-----------------------|-------------|--------------------|---------|------------------|-----------|---------|--------------------|-------------------|-------------|----------------------------|------|-----------------------------|-----------------------------------|
| Study/Year            | Sample Size | Age                | Symptom | Exposure         | Country   | Setting | Operator           | Device            | Incidence   | Cut-off                    | AUC  | Sensitivity/Specificity (%) |                                   |
| Frith 2011 [47]       | 204         | ≥50 years of age   | -       | smoker/ex-smoker | Australia | PC      | study nurse or GP* | PiKo-6®           | 27.9%       | <b>FEV1/FEV6 &lt; 0.75</b> | 0.85 | 81%/71%                     | post-BD FEV1/FVC spirometry < 0.7 |
| Frith 2011 [47]       | 204         | ≥50 years of age   | -       | smoker/ex-smoker | Australia | PC      | study nurse or GP  | CDQ               | 27.9%       | ≥ 16.5                     | 0.75 | 91.0%/37.0%                 | post-BD FEV1/FVC spirometry < 0.7 |
|                       |             |                    |         |                  |           |         |                    |                   |             | ≥ 19.5                     |      | 71.0%/62.0%                 |                                   |
| Thorn 2012 [48]       | 305         | 40–85 years of age |         | >15 pack-years   | Sweden    | PC      | nurse              | COPD-6            | 25.2%       | FEV1/FEV6 < 73%            | 0.84 | 73%/80.3%                   | post-BD FEV1/FVC spirometry       |

|                             |      |                    |                      |                           |             |             |                                      |         |       |                |       |             |                                 |
|-----------------------------|------|--------------------|----------------------|---------------------------|-------------|-------------|--------------------------------------|---------|-------|----------------|-------|-------------|---------------------------------|
|                             |      |                    |                      |                           |             |             |                                      |         |       |                |       |             | y<0.7                           |
| Van Den Bemt 2014 [49]      | 104  | ≥50 years of age   | respiratory symptoms | ≥1 pack-year              | Netherlands | PC          | GP*                                  | PiKo-6® | 42.3% | FEV1/FEV6< 73% | 0.937 | 93.2%/85.0% | post-BD FEV1/FVC spirometry<0.7 |
|                             |      |                    |                      |                           |             |             |                                      |         |       |                |       | 93.3%/70.3% | post-BD FEV1/FVC spirometry<LLN |
| Stanley 2014 [63]           | 1054 | 40–85 years of age |                      | former or current smokers | Australia   | PC          | GP                                   | CDQ     | 13.1% | ≥ 16.5         | 0.71  | 79.7%/46.8% | post-BD FEV1/FVC spirometry<0.7 |
|                             |      |                    |                      |                           |             |             |                                      |         |       | ≥ 19.5         |       | 63.0%/70.1% |                                 |
| Represas-Represas 2016 [50] | 362  | ≥40 years of age   | respiratory symptoms | >10 pack-years            | Spain       | PC, ES, CPh | PC doctors, ES doctors, pharmacists* | COPD-6  | 31.5% | FEV1/FEV6< 73% | 0.8   | 92.1%/52.8% | post-BD FEV1/FVC spirometry<0.7 |

|                        |      |                    |  |                                             |                                         |    |                                  |               |        |                 |       |                |                                  |
|------------------------|------|--------------------|--|---------------------------------------------|-----------------------------------------|----|----------------------------------|---------------|--------|-----------------|-------|----------------|----------------------------------|
| Labor 2016 [51]        | 227  | 40–60 years of Age |  | ≥20 pack-years                              | Croatia                                 | GP | GP offices*                      | COPD-6        | 18.9 % | FEV1/FEV6 <0.7  | 0.87  | 32.56 % /100 % | post-BD FEV1/FVC spirometry <0.7 |
| Kim 2016 [52]          | 190  | ≥40 years of age   |  | >10 pack-years                              | Korea                                   | PC | physicians *                     | COPD-6        | 23.7%  | FEV1/FEV6 <0.77 | 0.759 | 72.7%/77.1%    | post-BD FEV1/FVC spirometry <0.7 |
| Lopez Varela 2016 [61] | 1540 | ≥40 years of age   |  | ≥10 pack-years or exposure to biomass smoke | Argentina, Colombia, Venezuela, Uruguay | PC | GP                               | simple PUMA   | 20.1%  | ≥5              | 0.76  | 74.2%/64.8%    | post-BD FEV1/FVC spirometry <0.7 |
|                        |      |                    |  |                                             |                                         |    |                                  | Weighted PUMA |        | ≥25             |       | 0.79           |                                  |
| Llordes 2017 [62]      | 407  | ≥40 years of age   |  | ≥1 pack-year                                | Spain                                   | PC | PC physician, nurse, technician* | COPD-6        | 26.3%  | FEV1/FEV6 <0.78 | 0.801 | 87.9%/72.3%    | post-BD FEV1/FVC spirometry <0.7 |

|                       |      |                            |  |                       |        |    |                 |         |       |    |      |                 |                                               |
|-----------------------|------|----------------------------|--|-----------------------|--------|----|-----------------|---------|-------|----|------|-----------------|-----------------------------------------------|
| Spyratos<br>2017 [60] | 3234 | >40<br>years of<br>age and |  | ≥10<br>pack-<br>years | Greece | PC | GP              | COPD-PS | 10.9% | ≥5 | 0.79 | 56%/90<br>%     | post-BD<br>FEV1/FV<br>C<br>spirometr<br>y<0.7 |
| Spyratos<br>2017 [60] | 3234 | >40<br>years of<br>age and |  | ≥10<br>pack-<br>years | Greece | PC | GP              | CDQ     | 10.9% | 17 | 0.80 | 74%/72<br>%     | post-BD<br>FEV1/FV<br>C<br>spirometr<br>y<0.7 |
| Spyratos<br>2017 [60] | 3234 | >40<br>years of<br>age and |  | ≥10<br>pack-<br>years | Greece | PC | GP              | LFQ     | 10.9% | 18 | 0.81 | 49%/68<br>%     | post-BD<br>FEV1/FV<br>C<br>spirometr<br>y<0.7 |
| Llordes<br>2017 [62]  | 407  | ≥40<br>years of<br>age and |  | ≥1 pack-<br>year      | Spain  | PC | PC<br>physician | EGARPOC | 26.3% | 13 | 0.68 | 72.9%/4<br>6.8% | post-BD<br>FEV1/FV<br>C<br>spirometr<br>y<0.7 |
| Llordes<br>2017 [62]  | 407  | ≥40<br>years of            |  | ≥1 pack-<br>year      | Spain  | PC | PC<br>physician | COPD-PS | 26.3% | ≥4 | 0.65 | 80.4%/47.7      | post-BD<br>FEV1/FV                            |

|                      |     |                            |                             |                                                |                         |    |                 |                                   |       |                                    |        |                |                                            |
|----------------------|-----|----------------------------|-----------------------------|------------------------------------------------|-------------------------|----|-----------------|-----------------------------------|-------|------------------------------------|--------|----------------|--------------------------------------------|
|                      |     | age and                    |                             |                                                |                         |    |                 |                                   |       |                                    |        |                | C<br>spirometry<br>y<0.7                   |
| Llordes<br>2017 [62] | 407 | ≥40<br>years of<br>age and |                             | ≥1 pack-<br>year                               | Spain                   | PC | PC<br>physician | RHSQ                              | 26.3% | >17                                | 0.72   | 73.8%/<br>56%  | post-BD<br>FEV1/FVC<br>spirometry<br>y<0.7 |
| Quezada<br>2017 [65] | 17  | ≥40<br>years of<br>age     | respirator<br>y<br>symptoms | exposure<br>to smoke<br>or<br>biomass<br>smoke | US<br>(Spain<br>cohort) | MC | -               | CAPTURE<br>-S                     | -     | ≥ 2                                | 0.9276 | 88.0%/1<br>00% | post-BD<br>FEV1/FVC<br>spirometry<br>y<0.7 |
| Quezada<br>2017 [65] | 17  | ≥40<br>years of<br>age     | respirator<br>y<br>symptoms | exposure<br>to smoke<br>or<br>biomass<br>smoke | US<br>(Spain<br>cohort) | MC | -               | PFT                               | -     | males <<br>350<br>L/min            | 1.0000 | 100%/7<br>0%   | post-BD<br>FEV1/FVC<br>spirometry<br>y<0.7 |
|                      |     |                            |                             |                                                |                         |    |                 |                                   |       | females <<br>250<br>L/min          | 0.8939 |                |                                            |
| Quezada<br>2017 [65] | 17  | ≥40<br>years of<br>age     | respirator<br>y<br>symptom  | exposure<br>to smoke<br>or                     | US<br>(Spain<br>cohort) | MC | -               | CAPTURE<br>instrument<br>(CAPTURE | -     | Low risk :<br>CAPTURE<br>E-S (0-1; | 0.9525 | 88.2%/1<br>00% | post-BD<br>FEV1/FVC                        |

|  |  |  |   |                  |  |  |  |          |  |                                                                                                                                                                                                                                                 |  |  |                    |
|--|--|--|---|------------------|--|--|--|----------|--|-------------------------------------------------------------------------------------------------------------------------------------------------------------------------------------------------------------------------------------------------|--|--|--------------------|
|  |  |  | s | biomass<br>smoke |  |  |  | E-S+PFT) |  | PEF<br>testing is<br>not<br>Required)<br>Middle -<br>range :<br>CAPTUR<br>E-S (2-4;<br>undergo<br>PFT<br>testing,<br>applying<br>the<br>350/250<br>interpreta<br>tion)<br>High<br>risk :<br>CAPTUR<br>E-S (5-6;<br>should be<br>referred<br>for |  |  | spirometr<br>y<0.7 |
|--|--|--|---|------------------|--|--|--|----------|--|-------------------------------------------------------------------------------------------------------------------------------------------------------------------------------------------------------------------------------------------------|--|--|--------------------|

|                    |     |                  |                      |                                    |                   |    |   |                                  |   |                                                                             |        |             |                                  |
|--------------------|-----|------------------|----------------------|------------------------------------|-------------------|----|---|----------------------------------|---|-----------------------------------------------------------------------------|--------|-------------|----------------------------------|
|                    |     |                  |                      |                                    |                   |    |   |                                  |   | further testing)                                                            |        |             |                                  |
| Martinez 2017 [66] | 346 | ≥40 years of age | respiratory symptoms | exposure to smoke or biomass smoke | US (Spain cohort) | MC | - | CAPTURE                          | - | ≥ 2                                                                         | 0.7954 | 95.7%/44.4% | post-BD FEV1/FVC spirometry <0.7 |
| Martinez 2017 [66] | 346 | ≥40 years of age | respiratory symptoms | exposure to smoke or biomass smoke | US (Spain cohort) | MC | - | PFT                              | - | males < 350 L/min<br>females < 250 L/min                                    | 0.8783 | 88.0%/77.5% | post-BD FEV1/FVC spirometry <0.7 |
| Martinez 2017 [66] | 346 | ≥40 years of age | respiratory symptoms | exposure to smoke or biomass smoke | US (Spain cohort) | MC | - | CAPTURE instrument (CAPTURE+PFT) | - | Low risk : CAPTURE-S (0-1; PEF testing is not Required)<br>Middle - range : | 0.9057 | 89.7%/78.1% | post-BD FEV1/FVC spirometry <0.7 |

|                          |     |                  |                      |                |       |    |              |         |       |                                                                                                                                                             |      |            |                  |
|--------------------------|-----|------------------|----------------------|----------------|-------|----|--------------|---------|-------|-------------------------------------------------------------------------------------------------------------------------------------------------------------|------|------------|------------------|
|                          |     |                  |                      |                |       |    |              |         |       | <p>CAPTUR E-S (2-4; undergo PFT testing, applying the 350/250 interpretation)<br/> High risk : CAPTUR E-S (5-6; should be referred for further testing)</p> |      |            |                  |
| Hidalgo Sierra 2018 [54] | 155 | ≥40 years of age | respiratory symptoms | ≥10 pack-years | Spain | PC | physicians * | PiKo-6® | 52.9% | FEV1/FEV6 < 0.70                                                                                                                                            | 0.86 | 100%/97.2% | post-BD FEV1/FVC |



|                     |     |                  |                     |                    |       |    |                              |                  |       |                                         |        |              |                                  |
|---------------------|-----|------------------|---------------------|--------------------|-------|----|------------------------------|------------------|-------|-----------------------------------------|--------|--------------|----------------------------------|
|                     |     |                  | s                   |                    |       |    |                              |                  |       |                                         |        |              | spirometry <0.7                  |
| Ronaldson 2018 [55] | 216 | ≥35 years of age | -                   | current smokers    | UK    | PC | GP, practice nurse           | Micro-spirometer | 20.8% | FEV1/FVC <0.7                           | 0.73   | 88.9%/77.9%  | post-BD FEV1/FVC spirometry <0.7 |
| Ronaldson 2018 [55] | 216 | ≥35 years of age |                     | current smokers    | UK    | PC | respiratory specialist nurse | COPD-PS          | -     | ≥5                                      | 0.66   | 53.3%/78.6\$ | post-BD FEV1/FVC spirometry <0.7 |
| Ronaldson 2018 [55] | 216 | ≥35 years of age |                     | current smokers    | -     | PC | respiratory specialist nurse | CDQ              | -     | 16.5 or 19.5                            | 0.67   | 81.5%/52.3   | post-BD FEV1/FVC spirometry <0.7 |
| Soriano 2018 [69]   | 171 | age ≥35 years    | respiratory symptom | current and former | Spain | PC | -                            | COPD-PS+PFT      | -     | COPD-PS ≥4+PFT ≤ 2.2 l/s.m <sup>2</sup> | 0.7613 | 67.5%/71.3%  | post-BD FEV1/FVC spirometry      |

|                        |      |                  |                      |                                             |        |                       |                         |                   |       |                  |       |             |                                 |
|------------------------|------|------------------|----------------------|---------------------------------------------|--------|-----------------------|-------------------------|-------------------|-------|------------------|-------|-------------|---------------------------------|
| Lopez Varela 2019 [59] | 974  | ≥40 years of age |                      | ≥10 pack-years/or exposure to biomass smoke | Mexico | PC                    | GP                      | PUMA              | 45.1% | ≥5               | 0.70  | 85.4%/37.6  | post-BD FEV1/FVC spirometry<0.7 |
| Su 2019 [90]           | 301  | age ≥40 years    | respiratory symptom  | ≥20 pack-years                              | Taiwan | MC                    | -                       | P <sub>COPD</sub> | 48.8% | ≥0.65            | 0.87  | 63%/90%     | post-BD FEV1/FVC spirometry     |
| Dickens 2020 [56]      | 544  | ≥40 years of age | respiratory symptoms |                                             | UK     | PC                    | -                       | COPD-6            | -     | FEV1/FEV6 < 0.78 | 0.91  | 82.8%/85.0% | post-BD FEV1/FVC spirometry<0.7 |
| Fujita 2020 [57]       | 1001 | ≥40 years of age |                      | smoker/ex-smoker                            | Japan  | public health centres | laboratory technicians* | COPD-6            | -     | FEV1/FEV6 < 0.70 | 0.823 | 85.7%/74.6% | post-BD FEV1/FVC spirometry<0.7 |

|                              |       |                        |                                 |                                                |        |                               |                        |                    |        |                   |       |                  |                                               |
|------------------------------|-------|------------------------|---------------------------------|------------------------------------------------|--------|-------------------------------|------------------------|--------------------|--------|-------------------|-------|------------------|-----------------------------------------------|
| Preteroti<br>2020 [64]       | 499   | ≥18<br>years of<br>age | respirator<br>y<br>symptom<br>s |                                                | Canada | -                             | -                      | COPD-DQ            | 8.81%  | 20                | 0.71  | 89%/34<br>%      | post-BD<br>FEV1/FV<br>C<br>spirometr<br>y<0.7 |
| Preteroti<br>2020 [64]       | 499   | ≥18<br>years of<br>age | respirator<br>y<br>symptom<br>s |                                                | Canada | -                             | -                      | CAT                | 8.81%  | 10                | 0.58  | 92%/15<br>%      | post-BD<br>FEV1/FV<br>C<br>spirometr<br>y<0.7 |
| Siddharth<br>an 2020<br>[70] | 1,173 | age 35-<br>95 years    | respirator<br>y<br>symptom      | exposure<br>to smoke<br>or<br>biomass<br>smoke | Uganda | comm<br>unity<br>setting<br>s | -                      | COLA<br>instrument |        | COLA<br>score≥5   | 0.83  | -                | post-BD<br>FEV1/FV<br>C<br>spirometr<br>y     |
| Lin 2021<br>[58]             | 370   | ≥40<br>years of<br>age | respirator<br>y<br>symptom<br>s | ≥10 pack-<br>years                             | Taiwan | MC,<br>PC                     | outpatient<br>clinics* | Spirobank<br>Smart | 27.8%  | FEV1/FV<br>C <74% | 0.903 | 82.5%/<br>92.1%  | post-BD<br>FEV1/FV<br>C<br>spirometr<br>y<0.7 |
| Chen<br>2021 [67]            | 385   | age ≥40<br>years       | ≥1<br>respirator                | ≥10 pack-<br>years                             | Taiwan | MC,<br>PC                     | outpatient<br>clinics* | Spirobank<br>Smart | 26.23% | ≤0.74             | 0.87  | 84.2%/9<br>0.14% | post-BD<br>FEV1/FV                            |

|                     |      |                  |                                  |                          |        |           |                              |         |        |    |       |                  |                                           |
|---------------------|------|------------------|----------------------------------|--------------------------|--------|-----------|------------------------------|---------|--------|----|-------|------------------|-------------------------------------------|
|                     |      |                  | y<br>symptom                     |                          |        |           |                              |         |        |    |       |                  | C<br>spirometr<br>y                       |
| Chen<br>2021 [67]   | 385  | age ≥40<br>years | ≥1<br>respirator<br>y<br>symptom | ≥10 pack-<br>years       | Taiwan | MC,<br>PC | outpatient<br>clinics*       | COPD-PS | 26.23% | ≥5 | 0.64  | 83.2%/4<br>5.07% | post-BD<br>FEV1/FV<br>C<br>spirometr<br>y |
| Tanino<br>2021 [68] | 3252 | age ≥40<br>years | respirator<br>y<br>symptom       | current<br>and<br>former | Japan  | -         | respirator<br>y<br>physician | IPAG    | 6.77%  | 23 | 0.676 | 60.4%/6<br>3.8%  | post-BD<br>FEV1/FV<br>C<br>spirometr<br>y |

\*brief training on how to use the device; general practitioner (GP); primary care (PC), emergency services (ES), community pharmacies (CPh), medical center (MC); COPD-PS: Population Screener; CDQ: COPD diagnostic questionnaire; AUC: Area Under the Curve; CAPTURE: COPD assessment in primary care to identify undiagnosed respiratory disease and exacerbation risk; CAT: The COPD Assessment Test; COPD-DQ: COPD-Diagnostic Questionnaire; IPAG: International Primary Care Airways Group; RHSQ: Respiratory Health Screening Questionnaire; EGARPOC: COPD screening questionnaire from Terrassa; LFQ: Lung Function Questionnaire; PEF: peak expiratory flow; COLA: COPD in LMICs Assessment; FVC: Forced vital capacity; FEV1: Forced expiratory volume in 1 second.
